# Supplementary material for: Cohabitation, Relationship Stability, Relationship Adjustment, and Children’s Mental Health Over 10 Years
Source: Frontiers journal article supplement (doi:10.3389/fpsyg.2021.746306), 2022-02-02
Supplement: Data_Sheet_1.PDF [file Data_Sheet_1.PDF]

## Supplementary Tables

Table A1

### *Women's Descriptive Statistics and Correlations*

| Variables                     | 1      | 2      | 3     | 4      | 5      | 6      | 7     | 8      | 9     | 10    | 11    | <i>M</i> | <i>SD</i> |
|-------------------------------|--------|--------|-------|--------|--------|--------|-------|--------|-------|-------|-------|----------|-----------|
| 1. Relationship Adjustment T1 |        |        |       |        |        |        |       |        |       |       |       | 22.8     | 5.1       |
| 2. Relationship Adjustment T2 | .80**  |        |       |        |        |        |       |        |       |       |       | 23.5     | 4.9       |
| 3. Relationship Adjustment T3 | .71**  | .82**  |       |        |        |        |       |        |       |       |       | 23.4     | 5.0       |
| 4. Relationship Adjustment T4 | .72**  | .75**  | .78** |        |        |        |       |        |       |       |       | 23.0     | 5.1       |
| 5. Relationship Adjustment T5 | .71**  | .71**  | .71** | .77**  |        |        |       |        |       |       |       | 23.3     | 5.3       |
| 6. Relationship Adjustment T6 | .67**  | .66**  | .73** | .71**  | .73**  |        |       |        |       |       |       | 23.5     | 5.7       |
| 7. Relationship Adjustment T7 | .42**  | .49**  | .51** | .52**  | .57**  | .58**  |       |        |       |       |       | 20.5     | 5.8       |
| 8. Communication T1           | .69**  | .65**  | .56** | .60**  | .51**  | .58**  | .25** |        |       |       |       | 5.7      | 10.4      |
| 9. Internalizing Symptoms T1  | -.21** | -.15*  | -.11  | -.19** | -.21** | -.17*  | -.10  | -.32** |       |       |       | 8.4      | 6.3       |
| 10. Internalizing Symptoms T7 | -.14*  | -.10   | -.01  | -.13   | -.12   | -.06   | -.07  | -.17*  | .37** |       |       | 6.4      | 5.9       |
| 11. Externalizing Symptoms T1 | -.29** | -.22** | -.14* | -.21** | -.23** | -.24** | -.05  | -.34** | .61** | .27** |       | 11.6     | 7.4       |
| 12. Externalizing Symptoms T7 | -.13   | -.09   | -.09  | -.16*  | -.11   | -.12   | -.08  | -.23** | .30** | .47** | .47** | 7.1      | 7.2       |

\* $p < 0.05$ , \*\*  $p < 0.01$ . Abbreviations: Relationship Adjustment (ADAS; Sharpley & Rogers, 1984; Köppe, 2001) scores range from 0 to 5 with higher scores indicating more relationship satisfaction. Communication (Kroegeer et al., 2000; Christensen & Sullaway, 1984) scores range from 1 to 9 with higher scores indicating better couple communication. Higher child internalizing and externalizing symptoms (CBCL 1 1/2–5 and CBCL 4–18) indicate more problems. T1 = baseline, T2 = 6 months, T3 = 1-year, T4 = 2-year, T5 = 3-year, T6 = 4-year and T6 = 10-year-follow-up.

Table A2

*Men's Descriptive Statistics and Correlations*

| <b>Variables</b>              | <b>1</b> | <b>2</b> | <b>3</b> | <b>4</b> | <b>5</b> | <b>6</b> | <b>7</b> | <b><i>M</i></b> | <b><i>SD</i></b> |
|-------------------------------|----------|----------|----------|----------|----------|----------|----------|-----------------|------------------|
| 1. Relationship Adjustment T1 |          |          |          |          |          |          |          | 23.3            | 5.0              |
| 2. Relationship Adjustment T2 | .76**    |          |          |          |          |          |          | 23.2            | 4.6              |
| 3. Relationship Adjustment T3 | .74**    | .76**    |          |          |          |          |          | 23.5            | 4.7              |
| 4. Relationship Adjustment T4 | .69**    | .70**    | .79**    |          |          |          |          | 23.5            | 5.1              |
| 5. Relationship Adjustment T5 | .69**    | .70**    | .76**    | .81**    |          |          |          | 23.8            | 5.3              |
| 6. Relationship Adjustment T6 | .69**    | .69**    | .74**    | .73**    | .77**    |          |          | 23.4            | 5.6              |
| 7. Relationship Adjustment T7 | .64**    | .56**    | .60**    | .61**    | .61**    | .66**    |          | 23.8            | 5.8              |
| 8. Communication T1           | .68**    | .64**    | .64**    | .52**    | .54**    | .54**    | .48**    | 5.2             | 10.5             |

\* $p < 0.05$ , \*\*  $p < 0.01$ . Abbreviations: Relationship Adjustment (ADAS; Sharpley & Rogers, 1984; Köppe, 2001) scores range from 0 to 5 with higher scores indicating more relationship satisfaction. Communication (Kroegeer et al., 2000; Christensen & Sullaway, 1984) scores range from 1 to 9 with higher scores indicating better couple communication. Higher child internalizing and externalizing symptoms (CBCL1 1/2–5 and CBCL 4–18) indicate more problems. T1 = baseline, T2 = 6 months, T3 = 1-year, T4 = 2-year, T5 = 3-year, T6 = 4-year and T6 = 10-year-follow-up.
